# Supplementary material for: Perioperative Blood Transfusion Is Dose-Dependently Associated with Cancer Recurrence and Mortality after Head and Neck Cancer Surgery
Source: MDPI journal article supplement (doi:10.3390/cancers15010099), 2022-12-23
Supplement: s1 [file s1]

**Supplementary Table S2** Frequency table of perioperative packed red blood cell

transfusion in surgery for head and neck cancer

| Unit | Frequency | %    | Cumulative % |
|------|-----------|------|--------------|
| 0    | 491       | 71.9 | 71.9         |
| 1    | 3         | 0.4  | 72.3         |
| 2    | 49        | 7.2  | 79.5         |
| 3    | 3         | 0.4  | 79.9         |
| 4    | 53        | 7.8  | 87.7         |
| 6    | 42        | 6.1  | 93.9         |
| 7    | 4         | 0.6  | 94.4         |
| 8    | 27        | 4.0  | 98.4         |
| 9    | 1         | 0.1  | 98.5         |
| 10   | 6         | 0.9  | 99.4         |
| 11   | 1         | 0.1  | 99.6         |
| 12   | 2         | 0.3  | 99.9         |
| 22   | 1         | 0.1  | 100.0        |
