# Supplementary material for: Perioperative Blood Transfusion Is Dose-Dependently Associated with Cancer Recurrence and Mortality after Head and Neck Cancer Surgery
Source: MDPI journal article supplement (doi:10.3390/cancers15010099), 2022-12-23
Supplement: s1 [file s1]

**Supplementary Table S1** Results of logistic regression analysis for

inverse probability treatment weighting

|                                                          | OR   | 95% CI      | p       |
|----------------------------------------------------------|------|-------------|---------|
| Age                                                      | 1.02 | 1.00 ~ 1.05 | 0.090   |
| Sex (female vs. male)                                    | 0.97 | 0.34 ~ 2.75 | 0.953   |
| BMI                                                      | 0.97 | 0.91 ~ 1.04 | 0.390   |
| ASA > 3                                                  | 0.88 | 0.49 ~ 1.61 | 0.687   |
| Smoking                                                  | 0.77 | 0.31 ~ 1.92 | 0.569   |
| Betel nut chewing                                        | 2.26 | 1.09 ~ 4.69 | 0.029   |
| Alcohol                                                  | 0.83 | 0.44 ~ 1.58 | 0.569   |
| Preoperative hemoglobin                                  | 0.67 | 0.56 ~ 0.80 | < 0.001 |
| Anesthesia time*                                         | 2.94 | 1.99 ~ 4.34 | < 0.001 |
| Blood loss during surgery*                               | 1.97 | 1.62 ~ 2.40 | < 0.001 |
| Positive surgical margin                                 | 0.59 | 0.32 ~ 1.08 | 0.088   |
| Primary tumor (T3,4 vs. T1,2)                            | 2.08 | 1.11 ~ 3.88 | 0.021   |
| Lymph node involvement                                   | 1.76 | 0.95 ~ 3.25 | 0.072   |
| Histologic differentiation (Moderate to severe vs. well) | 0.92 | 0.54 ~ 1.56 | 0.754   |
| Adjunct radiotherapy                                     | 0.99 | 0.34 ~ 2.84 | 0.983   |

|                      |      |             |       |
|----------------------|------|-------------|-------|
| Adjunct chemotherapy | 0.83 | 0.30 ~ 2.33 | 0.725 |
|----------------------|------|-------------|-------|

---

OR: odds ratio; BMI: body mass index; ASA: ASA physical status. \*On base-2

logarithmic scale
