# Supplementary material for: Perioperative Blood Transfusion Is Dose-Dependently Associated with Cancer Recurrence and Mortality after Head and Neck Cancer Surgery
Source: MDPI journal article supplement (doi:10.3390/cancers15010099), 2022-12-23
Supplement: s1 [file s1]

**Supplementary Table S3** Distribution of occurred second primary cancers after surgery

for head and neck cancer

| Site          | Frequency | %    | Cumulative % |
|---------------|-----------|------|--------------|
| Head and neck | 59        | 59.0 | 59.0         |
| Esophagus     | 20        | 20.0 | 79.0         |
| Others        | 21        | 21.0 | 100.0        |
| Total         | 100       |      |              |
